# Supplementary material for: Task-Driven Activity Reduces the Cortical Activity Space of the Brain: Experiment and Whole-Brain Modeling
Source: PLoS Comput Biol. 2015 Aug 28;11(8):e1004445. doi: 10.1371/journal.pcbi.1004445 (PMC4552873; doi:10.1371/journal.pcbi.1004445)
Supplement: S1 Table — (DOC) [file pcbi.1004445.s002.doc]

| Excitatory gating variables |
| --- |
| = 310 (nC-1) |
| =125 (Hz) |
| =0.16 (s) |
| =100 (ms) |
| *I0,E=*0.3820 (nA) |
| Inhibitory gating variables |
| = 615 (nC-1) |
| =177 (Hz) |
| =0.087 (s) |
| = 10 (ms) |
| *I0,I =*0.2674 (nA) |
| Fixed local connectivity parameters |
| *wE E=*0.21 |
| *wII =*1 |
| *WIE =*0.15 |
| kinetic parameter |
| =0.641/1000 |
